# Supplementary material for: Photodynamic therapy downregulates the function of regulatory T cells in patients with esophageal squamous cell carcinoma
Source: Royal Society of Chemistry journal article supplement (doi:10.1039/c4pp00186a), 2014-07-09

**Supplementary Figure: Quantification of leukocytes in peripheral blood.** (A) Overall leukocytes, (B) neutrophils, (C) eosinophils, (D) monocytes, (E) lymphocytes, and (F) CD4+ cells. Absolute numbers were determined in blood samples collected from ESCC patients (n=8) before and at 7 and 14 days after PDT. Comparisons of numbers were done by Friedman test with Dunn post hoc correction and exact p-values were determined by Wilcoxon test.

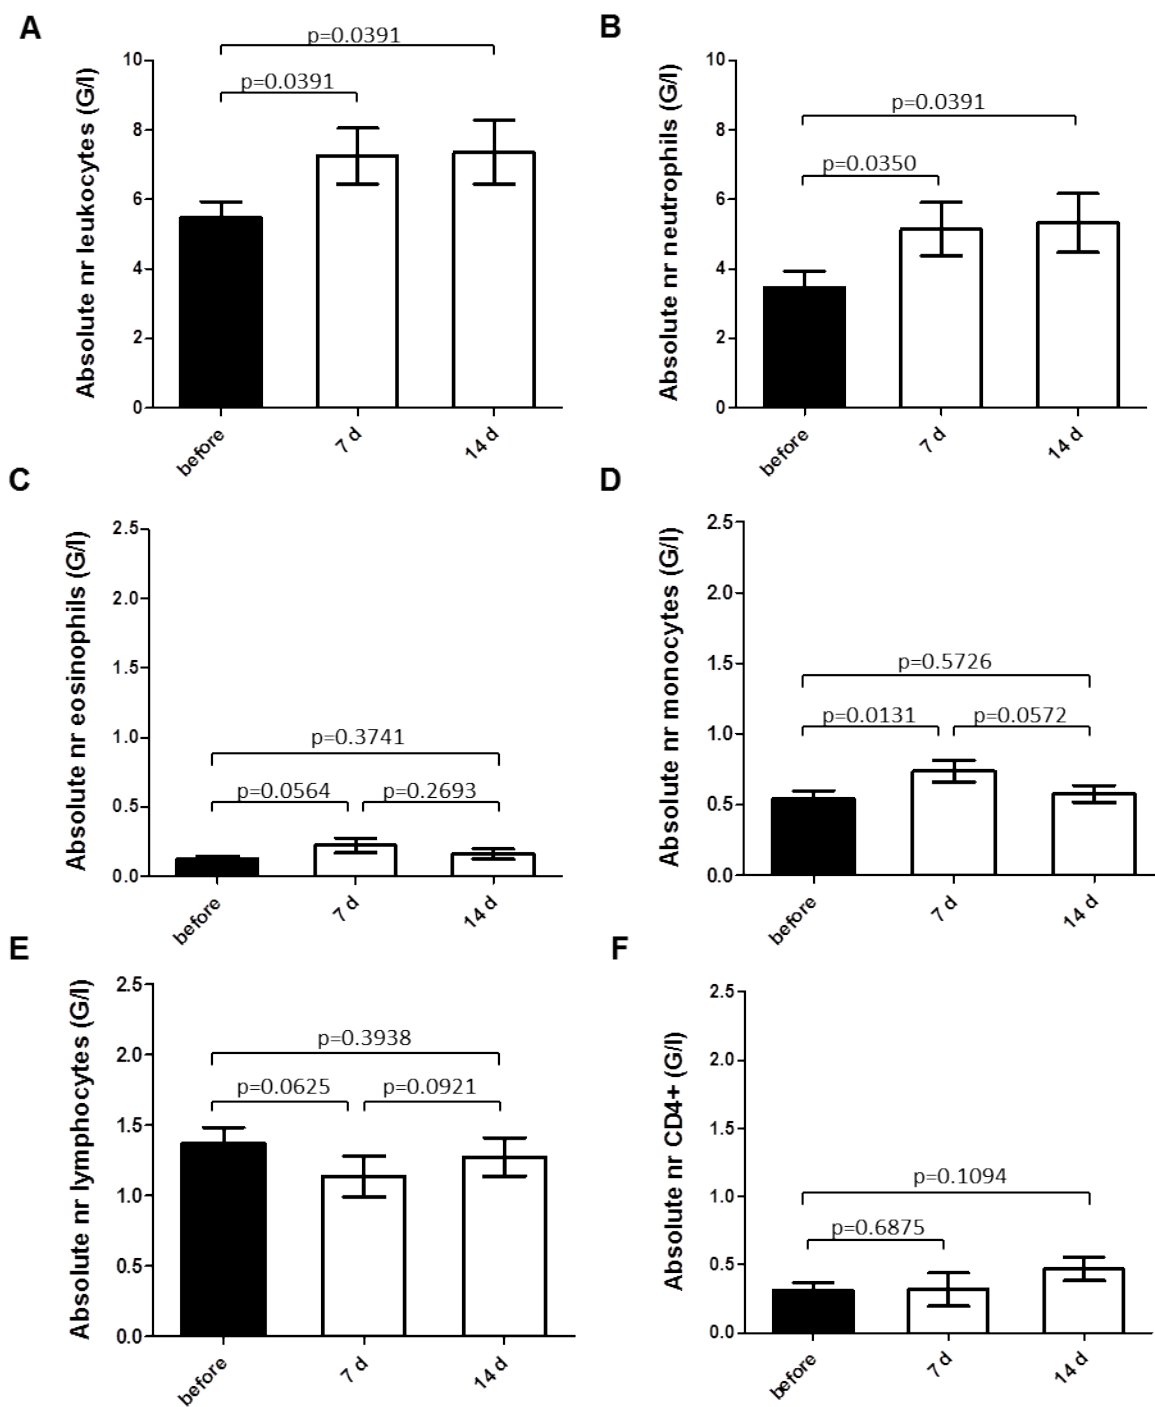

Supplement: c4pp00186a1.pdf [file c4pp00186a1.pdf]
