# Supplementary material for: Photodynamic therapy downregulates the function of regulatory T cells in patients with esophageal squamous cell carcinoma
Source: Royal Society of Chemistry journal article supplement (doi:10.1039/c4pp00186a), 2014-07-09
Supplement: c4pp00186a2.pdf [file c4pp00186a2.pdf]

## Supplementary Table.

| Patient characteristics and follow-up results |             |     |                 |                   |                    |                   |                                                                                                |                        |                                   |                                                                                                                                                                                                                                                        |
|-----------------------------------------------|-------------|-----|-----------------|-------------------|--------------------|-------------------|------------------------------------------------------------------------------------------------|------------------------|-----------------------------------|--------------------------------------------------------------------------------------------------------------------------------------------------------------------------------------------------------------------------------------------------------|
| Patient nr                                    | Age (years) | Sex | Tumor stage (a) | Location of tumor | Tumor stenosis (%) | Tumor length (cm) | Presence of tumor necrosis after PDT (as determined by clinical and/or histologic examination) | Esophagectomy post PDT | Postoperation tumor histology (b) | Follow-up                                                                                                                                                                                                                                              |
| N1                                            | 79          | M   | n.a.            | Middle third      | 75                 | 5                 | Yes                                                                                            | No                     | Lost in follow-up                 | Patient refused further treatment. Died 23 months after PDT                                                                                                                                                                                            |
| N2                                            | 63          | F   | n.a.            | Middle third      | 75                 | 6                 | Yes (c)                                                                                        | No                     | n.a.                              | Patient was unfit for surgery due to cachexia. Received endoluminal brachytherapy and external mediastinal radiation. Endoscopic esophageal stent implantation was done; stent penetration into the trachea caused patient's death 12 months after PDT |
| N3                                            | 70          | M   | IIA             | Middle third      | 75                 | 10                | Yes                                                                                            | Yes                    | SCC G2 pT3 N0 R0 M0               | Patient had tumor recurrence in the hypopharynx. Died 7 months after PDT due to hypopharynx tumor progression                                                                                                                                          |
| N4                                            | 73          | M   | IIA             | Middle third      | 50                 | 6                 | Yes                                                                                            | Yes                    | SCC G3 pT3 N0 M0 R0 V1            | Alive, 23 months after PDT                                                                                                                                                                                                                             |
| N5                                            | 62          | F   | I               | Middle third      | 25                 | 2                 | Yes                                                                                            | Yes                    | SCC G3 pT1b N0 R0 M0              | Alive, 15 months after PDT. Strong suspicion of mediastinal lymph node metastases and pulmonary metastases                                                                                                                                             |
| N6                                            | 62          | M   | IIIC            | Middle third      | 75                 | 6                 | Yes                                                                                            | Yes                    | SCC G3 pT4 N2 L0 V1 R2            | Alive, 15 months after PDT. Patient exhibited liver metastasis; received palliative chemotherapy and external mediastinal radiation                                                                                                                    |
| N7                                            | 63          | M   | I               | Middle third      | 25                 | 5                 | Yes (c)                                                                                        | Yes                    | SCC pG2 T2 N0 M0 R0               | Alive, 14 months after PDT                                                                                                                                                                                                                             |
| N8                                            | 60          | M   | IIIB            | Distal third      | 50                 | 3                 | Yes                                                                                            | Yes                    | SCC G2 pT3 N1 N0 R0 M0            | Alive, 13 months after PDT                                                                                                                                                                                                                             |

(a) Tumor stage according to TNM (tumor, node, metastasis) staging system <sup>1</sup>

(b) Classifications according to <sup>2</sup>

(c) Maximal necrosis compared to other cases

n.a.: not available

1. A. Pennathur, M. K. Gibson, B. A. Jobe and J. D. Luketich, *Lancet*, 2013, **381**, 400-412.
2. T. W. Rice, E. H. Blackstone and V. W. Rusch, *The Journal of thoracic and cardiovascular surgery*, 2010, **139**, 527-529.
